# Supplementary material for: A Facile Glycerol-Assisted Synthesis of Low-Cu2+-Doped CoFe2O4 for Electrochemical Sensing of Acetaminophen
Source: MDPI journal article supplement (doi:10.3390/bios13120997), 2023-11-23
Supplement: s1 [file s1]

# A facile glycerol-assisted synthesis of low-Cu<sup>2+</sup>-doped CoFe<sub>2</sub>O<sub>4</sub> for electrochemical sensing of acetaminophen

José Guillermo Alfonso-González <sup>1</sup>, Claudia Patricia Granja-Banguera <sup>1,†</sup>, Jimmy Alexander Morales-Morales <sup>1,\*</sup> and Andrés Dector <sup>2,†</sup>

<sup>1</sup> Grupo de Investigación en Química y Biotecnología (QUIBIO), Facultad de Ciencias Básicas, Campus Pampalinda, Universidad Santiago de Cali, Cali 760035, Colombia; jose.alfonso00@usc.edu.co (J.G.A.-G.); claudia.granja00@usc.edu.co (C.P.G.-B.)

<sup>2</sup> CONAHCYT, (Consejo Nacional de Humanidades, Ciencias y Tecnologías), Universidad Tecnológica de San Juan del Río, San Juan del Río, 76800, Querétaro, México; adector@conahcyt.mx (A.D.)

\* Correspondence: jimmy.morales00@usc.edu.co

† These authors contributed equally to this work.

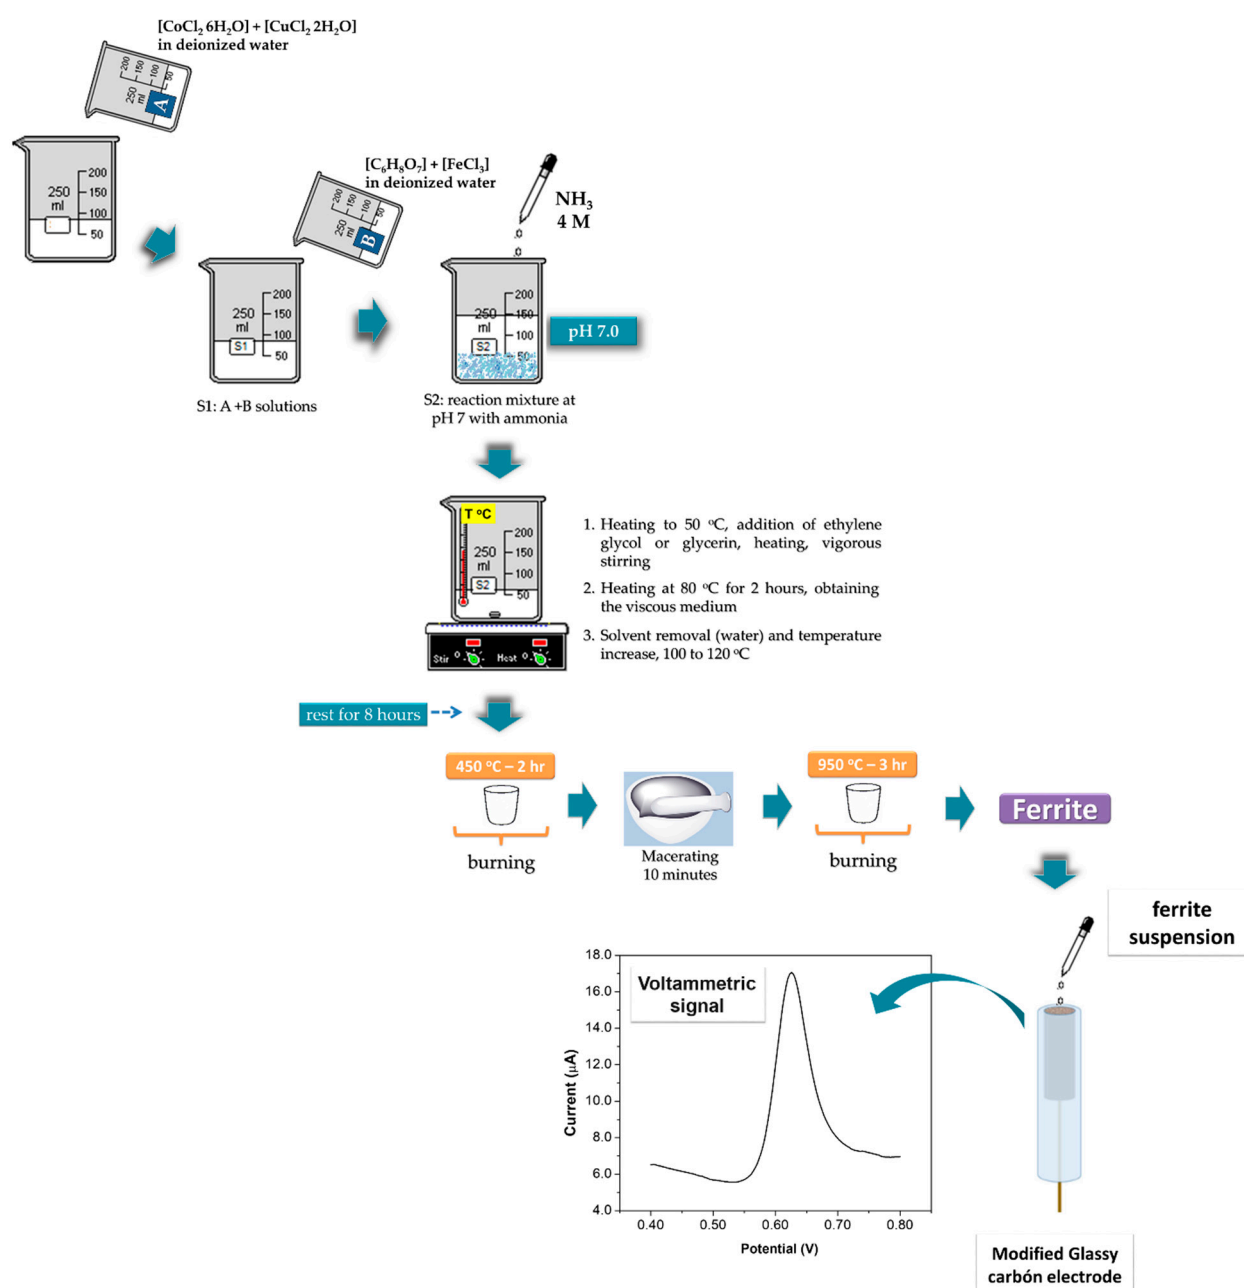

**Figure S1.** Representation of the experimental sequence of preparation and monitoring of electrochemical signals during acetaminophen sensing, using LCF NPs spinel-type.

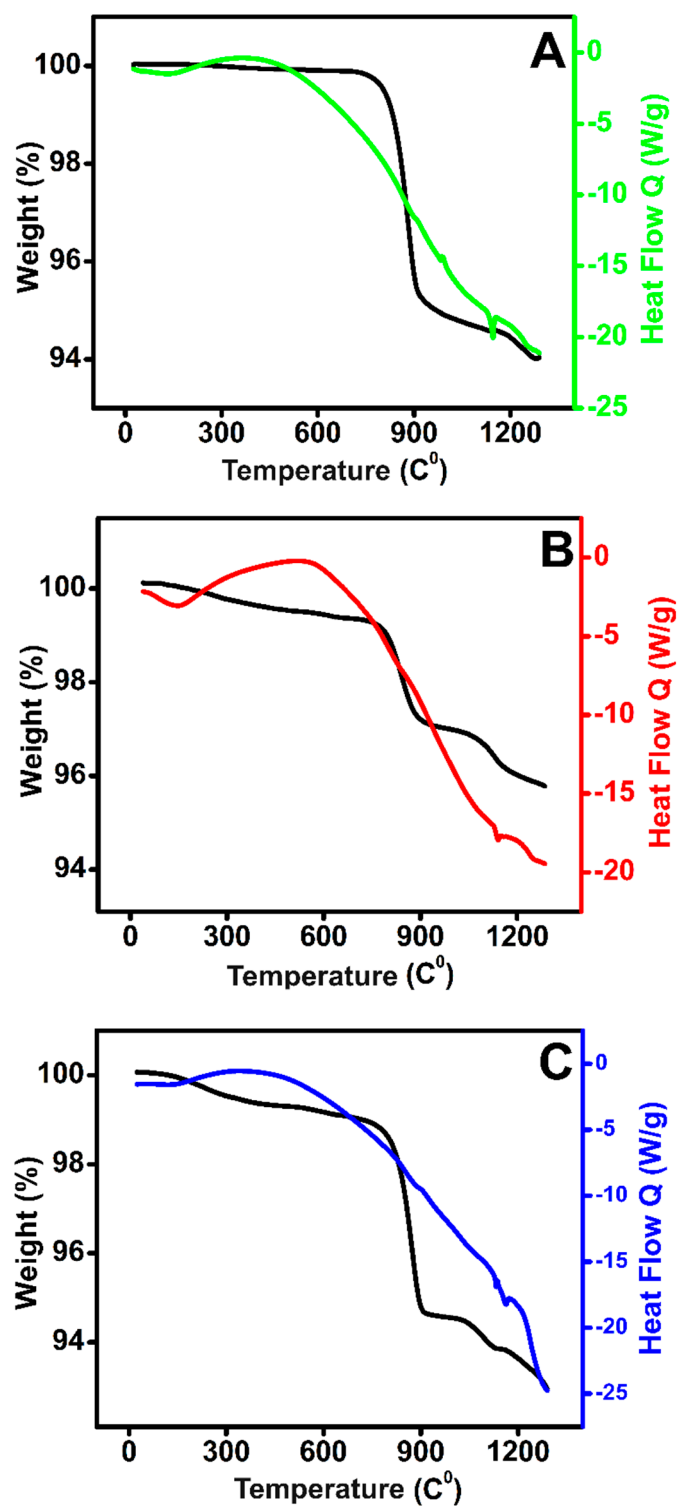

**Figure S2.** TGA spectra of the LCF NPs (a) + glycerin and eight hour standing time S-013; (b) + glycerin, S-009; and (c) + propylene glycol S-028, respectively.

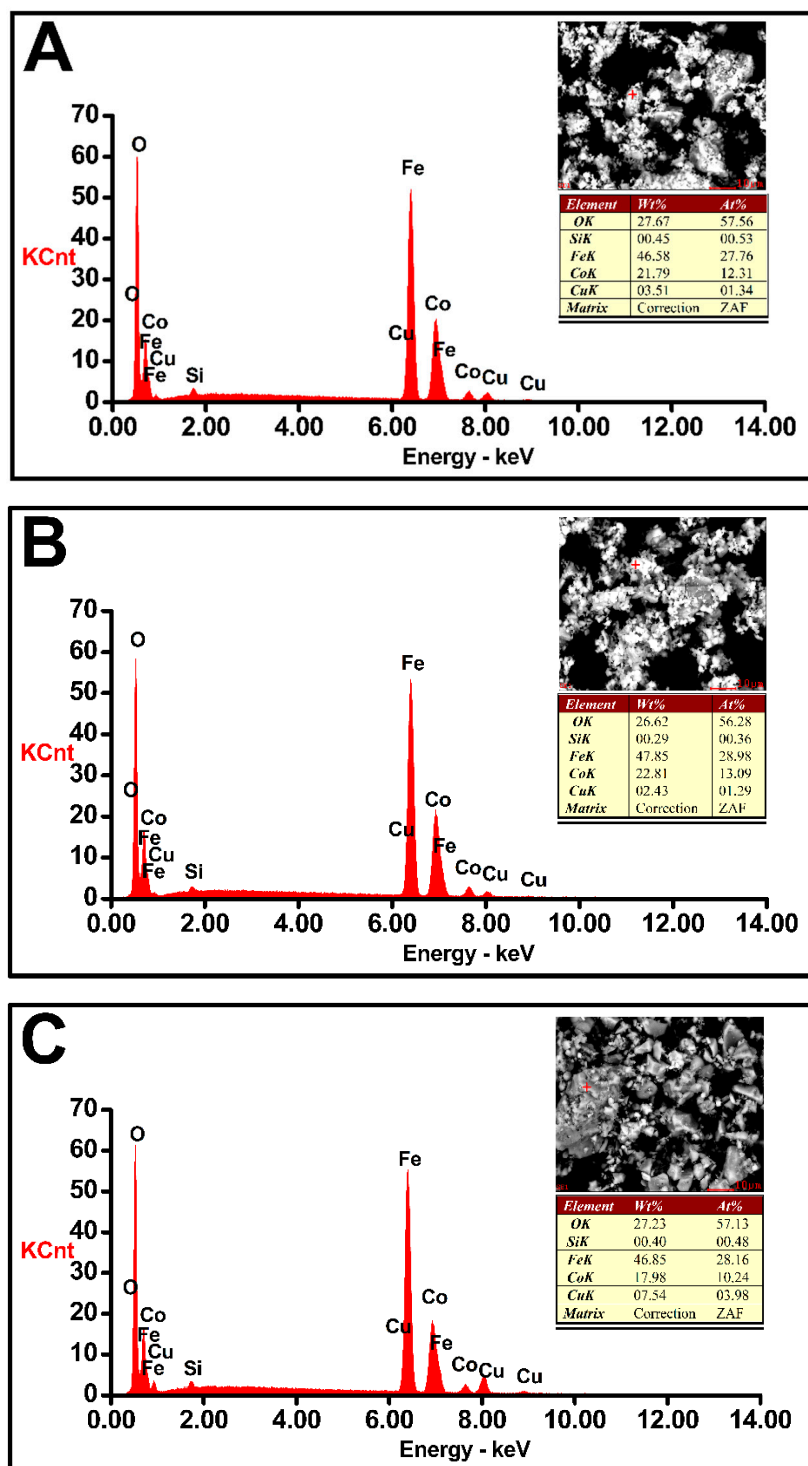

**Figure S3.** SEM images and quantitative results obtained from EDS analysis of synthesized LCF NPs. A. S-013; B. S-009 and C. S-028 samples respectively

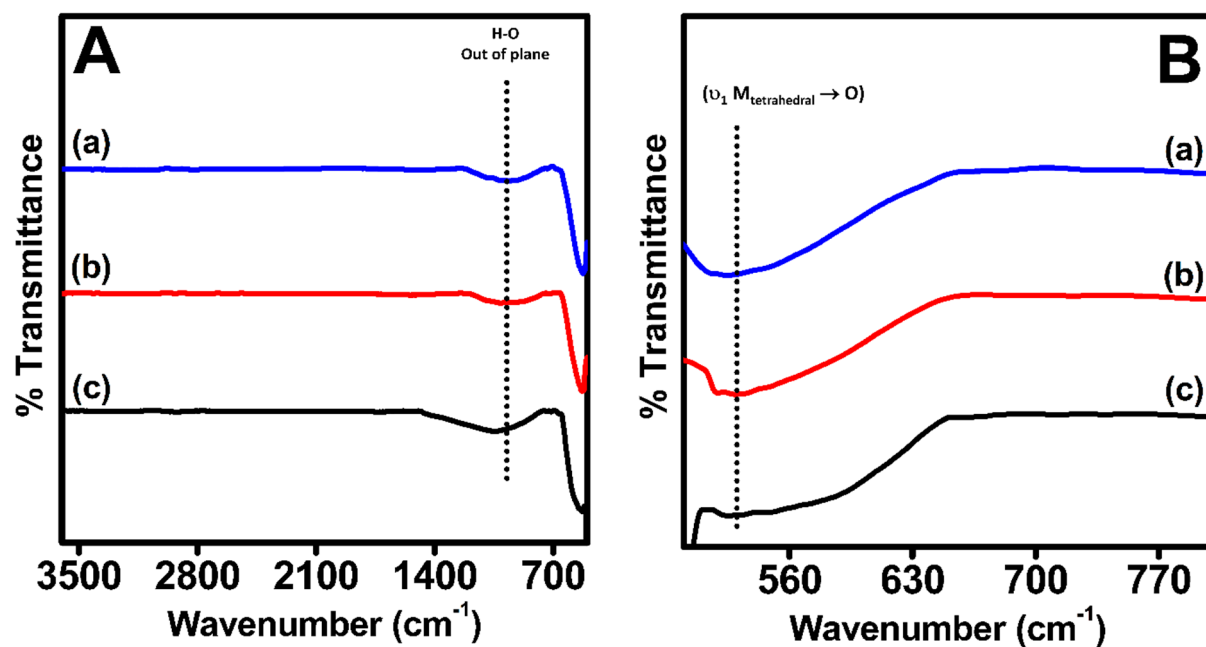

**Figure S4.** FTIR spectra of LCF NPs in the frequency range of (A) 500–3600  $\text{cm}^{-1}$ , (B) 500–800  $\text{cm}^{-1}$ . Effect of hydroxylated agents and standing time before calcination. (a) + glycerin, S-009; (b) + glycerin and eight hour standing time S-013; and (c) + propylene glycol S-028, respectively.

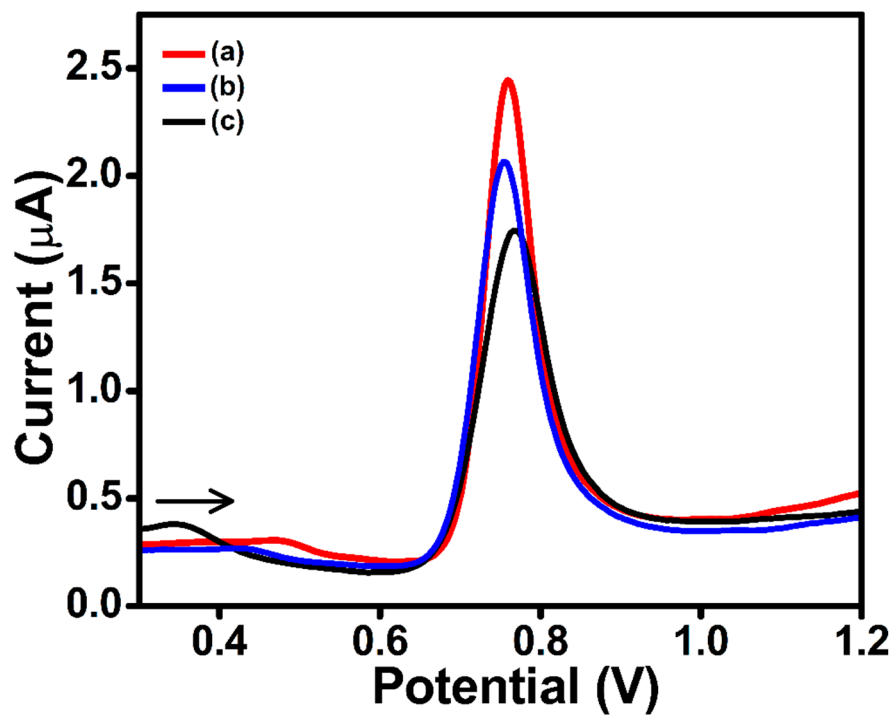

**Figure S5.** DPVs of 20.0  $\mu\text{M}$  AC in 0.1 M PBS at pH2.5. (a) The S-013/GCE electrode (red), (b) the GCE bare electrode (blue) and (c) the S-028/GCE electrode (black) respectively. The DPV specifications were  $0.3 \leq E_{\text{pa}} \leq 1.2$  V at a step potential of 5 mV, pulse amplitudes of 100 mV, pulse times of 50 ms, and a scan rate of  $10 \text{ mV s}^{-1}$ .

$$I_p = 2.69 \times 10^5 A C n^{3/2} D^{1/2} \nu^{1/2} \quad (\text{S1})$$

where  $I_p$  is the anodic or cathodic peak current (A),  $A$  is the electroactive area ( $\text{cm}^2$ ),  $C$  is the molar concentration of the redox substance,  $n$  is the number of the transferred electron in the redox reaction,  $D$  is the diffusion coefficient of redox probe molecule ( $\text{cm}^2 \text{s}^{-1}$ ) and  $\nu$  is the scan rate ( $\text{V s}^{-1}$ ).

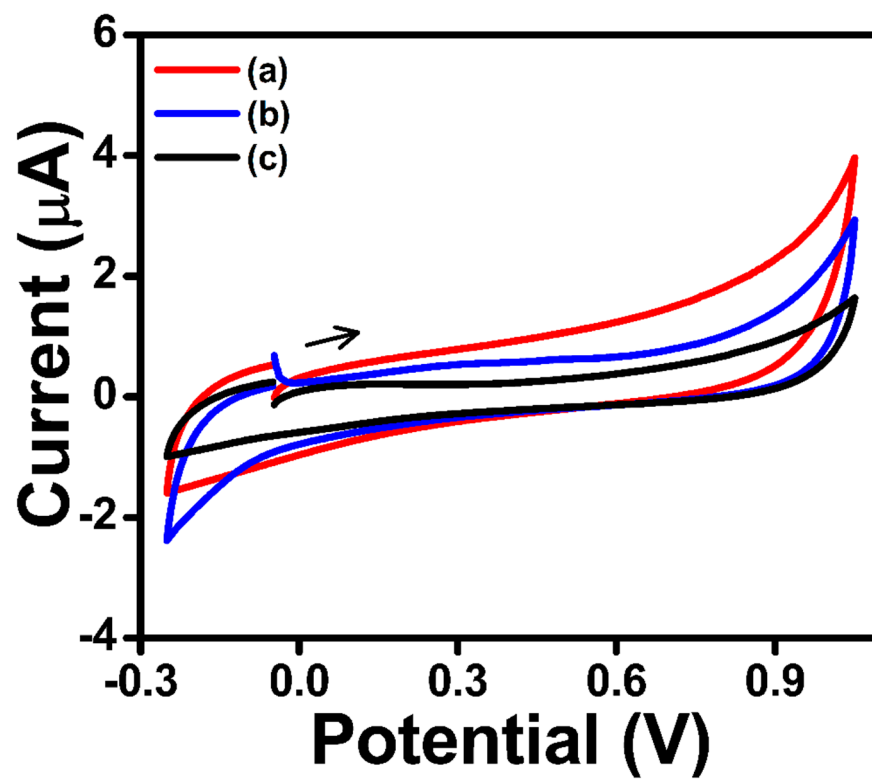

**Figure S6.** The CVs of the bare electrode, the S-013/GCE, GCE and S-028/GCE electrode in the absence of AC in 0.1M PBS at pH 2.5,  $v$ : 0.05  $\text{Vs}^{-1}$ .

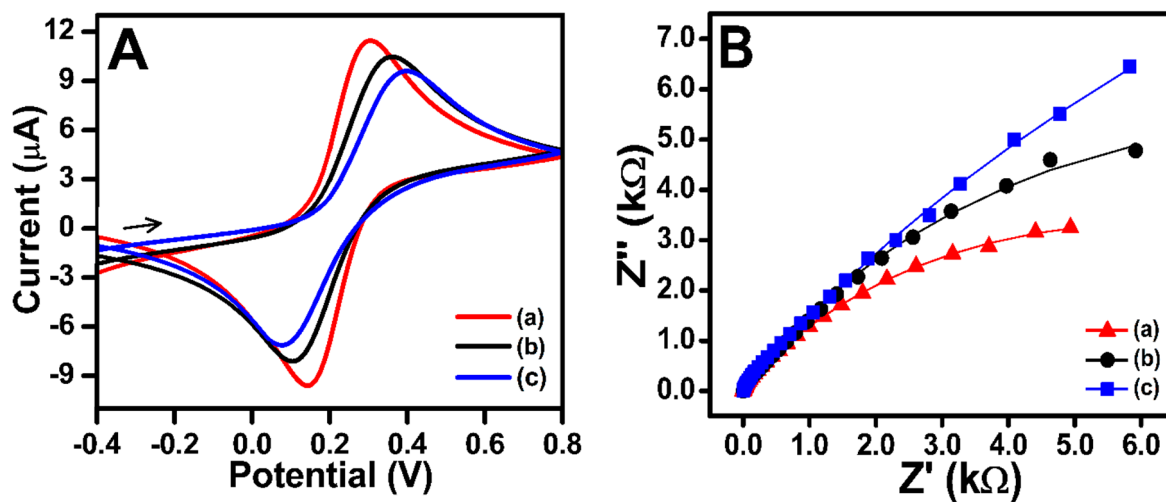

**Figure S7.** A. Cyclic voltammograms CV at  $v: 0.1 \text{ V s}^{-1}$  and B. Electrochemical Impedance Spectroscopy EIS respectively, of  $2.5 \text{ mM } [\text{Fe}(\text{CN})_6]^{3-/4-}$  in  $0.1 \text{ M KCl}$ , at (a) S-013/GCE, (b) GCE bare electrode, (c) S-028/GCE electrode.

$$K^{\circ} = \frac{RT}{F^2 R_{ct} AC} \quad (S2)$$

Where R is the global gas constant (8.314 J K<sup>-1</sup> mol<sup>-1</sup>), T is the thermodynamic temperature (298.15 K), F is the Faraday constant (96,485 C mol<sup>-1</sup>), R<sub>ct</sub> is the electron transfer resistance (Ω), A is the electrode surface area (cm<sup>2</sup>), C is the [Fe(CN)<sub>6</sub>]<sup>3-/4-</sup> solution concentration (2.5 mM) and K<sup>0</sup> represents the rate constant of a standard heterogeneous electron transfer (cm s<sup>-1</sup>).



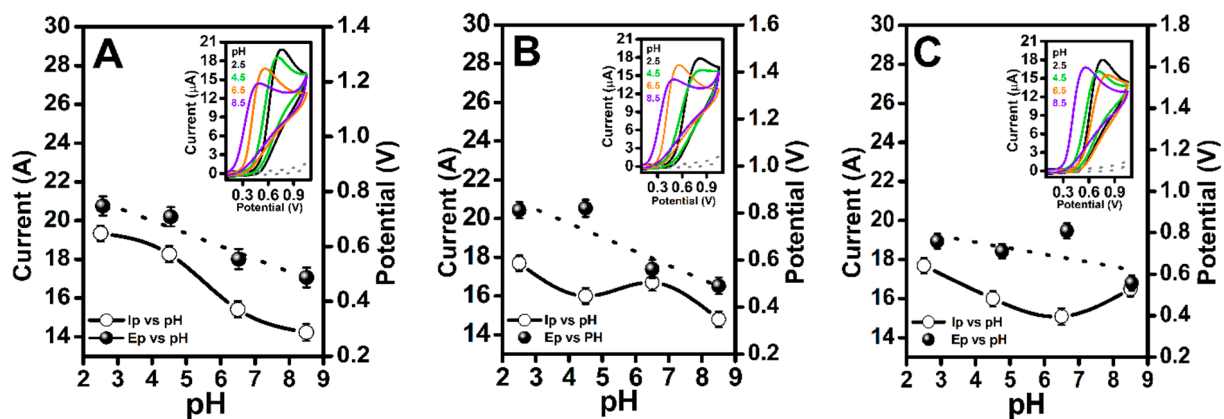

**Figure S8.** Effect of pH values on the peak potential (dash line) and peak current (solid line) of AC on the LCF NPs/GCE electrodes at various pH values,  $v$ : 0.05 Vs<sup>-1</sup>. **A.** S-013/GCE, **B.** GCE bare and **C.** S-028/GCE electrodes. Insert: cyclic voltammograms of solution containing 2.5 mM AC + PBS buffer in the pH range of 2.5–8.5 at the LCF NPs/GCE.

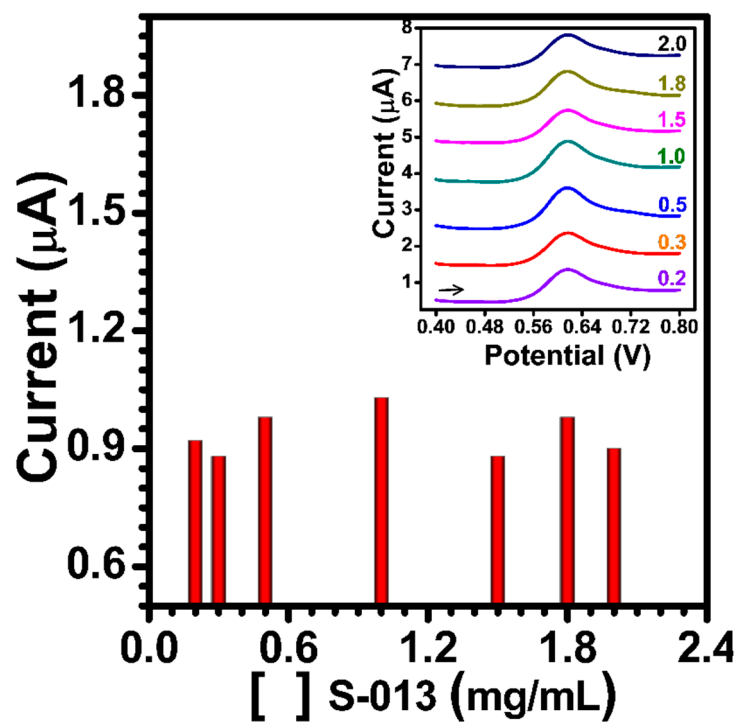

**Figure S9.** Effect of S-013 nanoparticles concentration on AC response using S 013/GCE electrode with 10.0  $\mu\text{M}$  AC in 0.1 M PBS. Insert show additions of 0.2, 0.3, 0.5, 1.0, 1.5, 1.8 and 2.0  $\text{mg mL}^{-1}$  of S-013 nanoparticles, respectively.

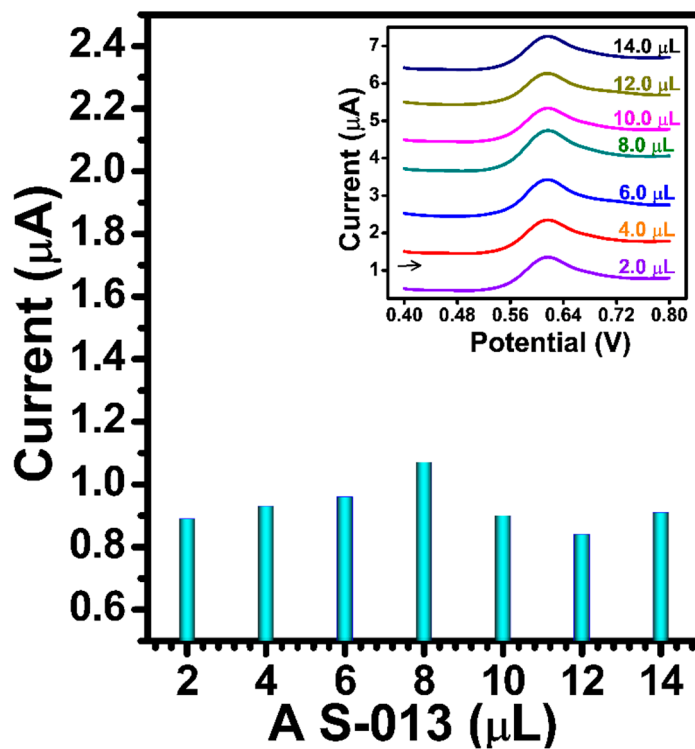

**Figure S10.** Effect of S-013 amount on AC response using the S-013/GCE electrode, with 10.0  $\mu\text{M}$  AC in 0.1 M PBS. Insert show additions of 2.0, 4.0, 6.0, 8.0, 10.0, 12.0 and 14.0  $\mu\text{L}$  of S-013 nanoparticles, respectively.

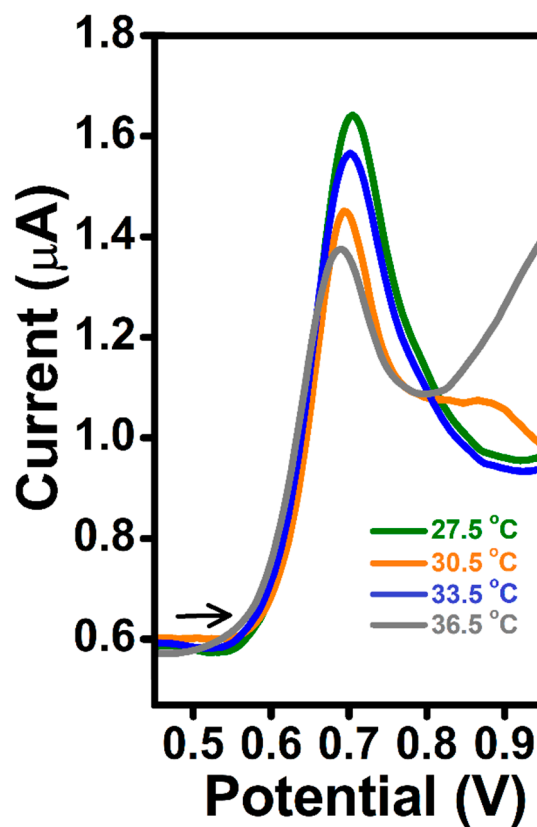

Figure S11. DPV signals from 10  $\mu\text{M}$  AC in 0.1 M PBS. Effect of solution temperature.

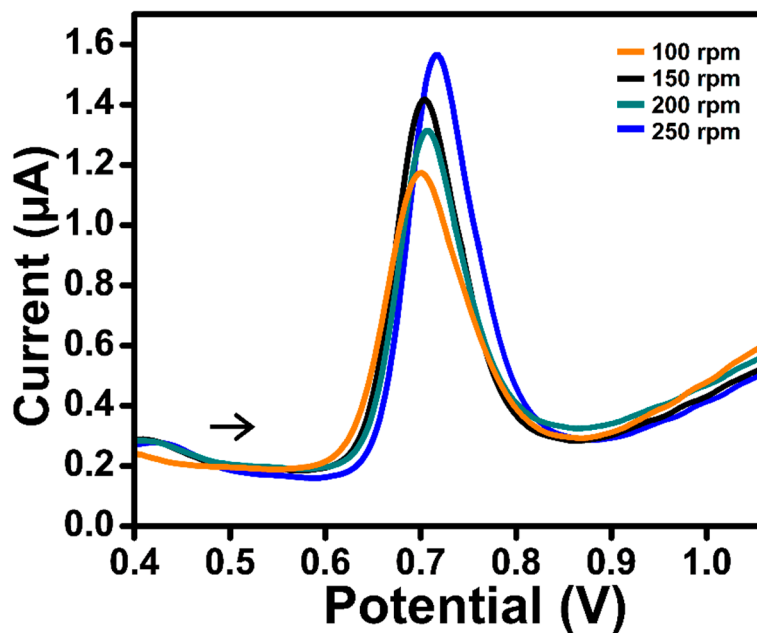

Figure S12. DPV signals from 10  $\mu\text{M}$  AC in 0.1 M PBS. Effect of solution stirring speeds.

**Table S1.** Comparison of the electrocatalytic performance of different modified electrodes for the determination of AC.

| Modified electrode                                                              | Technique | Linear range<br>( $\mu\text{M}$ ) | Detection limit<br>( $\mu\text{M}$ ) | References       |
|---------------------------------------------------------------------------------|-----------|-----------------------------------|--------------------------------------|------------------|
| Graphene–chitosan/GCE                                                           | DPV       | 1–100                             | 0.3                                  | 87               |
| MWNT/GCE                                                                        | DPV       | 5–100                             | 2.4                                  | 88               |
| TiO <sub>2</sub> -graphene/poly(methyl red)/GCE                                 | DPV       | 0.25–50                           | 0.025                                | 89               |
| Nano-TiO <sub>2</sub> /poly(acid yellow 9)/GCE                                  | DPV       | 12–120                            | 0.2                                  | 90               |
| C60-modified glassy carbon electrode                                            | DPV       | 50–1500                           | 50.27                                | 91               |
| Poly(taurine)/MWCNT/GCE                                                         | DPV       | 1–100                             | 0.500                                | 92               |
| Graphene/GCE                                                                    | DPV       | 0.1–20                            | 0.032                                | 93               |
| Ba <sub>1.0</sub> Co <sub>1.22</sub> Fe <sub>1.41</sub> O <sub>18.11</sub> /GCE | DPV       | 1–12                              | 0.530                                | 94               |
| rGO-PEDOT NT/GCE                                                                | DPV       | 1–35                              | 0.400                                | 95               |
| Fe <sub>3</sub> O <sub>4</sub> @Au–S–Fc/GS-chitosan/GCE                         | DPV       | 0.4–32                            | 0.050                                | 96               |
| 4-ABA/ERGO/GCE                                                                  | DPV       | 0.1–65                            | 0.010                                | 97               |
| Co <sub>0.87</sub> Cu <sub>0.13</sub> Fe <sub>2</sub> O <sub>4</sub> /GCE       | DPV       | 10–100                            | 0.099                                | <b>This work</b> |

## Reference

87. Zheng, M.X.; Gao, F.; Wang, Q.X.; Cai, X.L.; Jiang, S.L.; Huang, L.Z.; Gao, F. Electrocatalytic oxidation and sensitive determination of acetaminophen on glassy carbon electrode modified with graphene–chitosan composite *Mater. Sci. Eng. C*, **2013**, *33*, 1514–1520
88. Wan, Q.J.; Wang, X.W.; Yu, F.; Wang, X.X.; Yang, N.J. Effects of capacitance and resistance of MWNT-film coated electrodes on voltammetric detection of acetaminophen *J. Appl. Electrochem.*, **2009**, *39*, 1145–1151
89. Xu, C.; Huang, K.; Fan, Y.; Wu, Z.; Li J. Electrochemical determination of acetaminophen based on TiO<sub>2</sub>-graphene/poly(methyl red) composite film modified electrode *J. Mol. Liq.*, **2012**, *165*, 32–37
90. Kumar, S.A.; Tang, C.F.; Chen S.M. Electroanalytical determination of acetaminophen using nano-TiO<sub>2</sub>/polymer coated electrode in the presence of dopamine *Talanta*, **2008**, *76*, 997–1005
91. Goyal, R.N.; Singh, S.P. Voltammetric determination of paracetamol at C60-modified glassy carbon electrode. *Electrochim. Acta* **2006**, *51*, 3008–3012.
92. Wan, Q.; Wang, X.; Yu, F.; Wang, X.; Yang N. Poly(taurine)/MWNT-modified glassy carbon electrodes for the detection of acetaminophen. *J. Appl. Electrochem.*, **2009**, *39*, 785–790
93. Kang, X.; Wang, J.; Wu, H.; Liu, J.; Aksay, I.A.; Lin Y. A graphene-based electrochemical sensor for sensitive detection of paracetamol. *Talanta*, **2010**, *81*, 754–759
94. Granja-Banguera C.P.; Silgado-Cortázar D.G.; Morales-Morales J.A. Transition Metal Substituted Barium Hexaferrite Modified Electrode: Application as Electrochemical Sensor of Acetaminophen. *Molecules* **2022**, *27*, 1550
95. Huang, T.Y.; Kung, C.W.; Wei, H.Y.; Boopathi, K.M.; Chu, C.W.; Ho, K.C. A high performance electrochemical sensor for acetaminophen based on a rGO-PEDOT nanotube composite modified electrode. *J. Mater. Chem. A*, **2014**, *2*, 7229–7237
96. Liu, M.; Chen, Q.; Lai, C.L.; Zhang, Y.Y.; Deng, J.H.; Li, H.T.; Yao S.Z. A double signal amplification platform for ultrasensitive and simultaneous detection of ascorbic acid, dopamine, uric acid and acetaminophen based on a nanocomposite of ferrocene thiolate stabilized Fe<sub>3</sub>O<sub>4</sub>@Au nanoparticles with graphene sheet *Biosens. Bioelectron.*, **2013**, *48*, 75–81
97. Zhu, W.; Huang, H.; Gao, X.; Ma, H. Electrochemical behavior and voltammetric determination of acetaminophen based on glassy carbon electrodes modified with poly(4-aminobenzoic acid)/electrochemically reduced graphene oxide composite films. *Materials Science and Engineering: C*, **2014**, *45*, 21–28

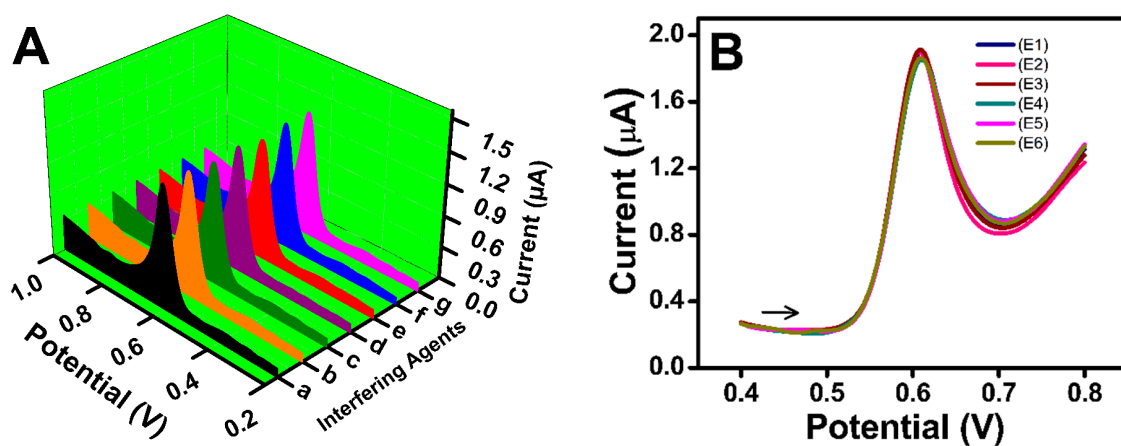

**Figure S13.** A. DPVs of 5  $\mu\text{M}$  AC with 100-fold concentrations of (a)  $\text{K}^+$ , (b)  $\text{Ca}^{2+}$ , (c)  $\text{Na}^+$ , (d)  $\text{Mg}^{2+}$ , (e) ascorbic acid, (f) uric acid and (g) glucose. B. The reproducibility curves of 10  $\mu\text{M}$  AC at six different S-013/GCE electrodes, E1 to E6 respectively

**Table S2.** The effect of different interferences at S-013/GCE in the determination of AC.

|   | Interference     | Concentration ( $\text{mol L}^{-1}$ ) | Peak change (%) |
|---|------------------|---------------------------------------|-----------------|
| a | $\text{K}^+$     | $5 \times 10^{-4}$                    | 2.17            |
| b | $\text{Ca}^{2+}$ | $5 \times 10^{-4}$                    | 2.04            |
| c | $\text{Na}^+$    | $5 \times 10^{-4}$                    | 2.21            |
| d | $\text{Mg}^{2+}$ | $5 \times 10^{-4}$                    | 2.26            |
| e | Ascorbic Acid    | $5 \times 10^{-4}$                    | 2.38            |
| f | Uric Acid        | $5 \times 10^{-4}$                    | 2.46            |
| g | Glucose          | $5 \times 10^{-4}$                    | 2.14            |
